# Supplementary material for: Association between Proton Pump Inhibitor Use and Parkinson’s Disease in a Korean Population
Source: MDPI journal article supplement (doi:10.3390/ph15030327), 2022-03-09
Supplement: s1 [file s1]

**Table S1.** Adjusted odds ratios of proton pump inhibitor use for Parkinson's disease with subgroup analyses stratified based on various comorbidities

| Characteristics                             | Number of<br>Parkinson's diseases | Number of controls   | Odds ratio for Parkinson's disease<br>(95% confidence interval) |                     | P-value for<br>interaction |
|---------------------------------------------|-----------------------------------|----------------------|-----------------------------------------------------------------|---------------------|----------------------------|
|                                             | (exposure/total, %)               | (exposure/total, %)  | Adjusted <sup>b</sup>                                           | P-value             |                            |
| Age groups                                  |                                   |                      |                                                                 |                     | 0.151                      |
| Age <75 years old (n = 18,470)              | 610/3,694 (16.5%)                 | 1,669/14,776 (11.3%) | 1.25 (1.11-1.40)                                                | <0.001 <sup>a</sup> |                            |
| Age ≥75 years old (n = 11,495)              | 419/2,299 (18.2%)                 | 1,158/9,196 (12.6%)  | 1.36 (1.19-1.55)                                                | <0.001 <sup>a</sup> |                            |
| Sex                                         |                                   |                      |                                                                 |                     | 0.589                      |
| Male (n = 14,000)                           | 422/2,800 (15.1%)                 | 1,257/11,200 (11.2%) | 1.21 (1.06-1.38)                                                | 0.005 <sup>a</sup>  |                            |
| Female (n = 15,965)                         | 607/3,193 (19.0%)                 | 1,570/12,772 (12.3%) | 1.36 (1.21-1.53)                                                | <0.001 <sup>a</sup> |                            |
| Income groups                               |                                   |                      |                                                                 |                     | 0.208                      |
| Low (n = 13,085)                            | 478/2,617 (18.3%)                 | 1,201/10,468 (11.5%) | 1.43 (1.26-1.63)                                                | <0.001 <sup>a</sup> |                            |
| High (n = 16,880)                           | 551/3,376 (16.3%)                 | 1,626/13,504 (12.0%) | 1.20 (1.07-1.35)                                                | 0.002 <sup>a</sup>  |                            |
| Region of residence                         |                                   |                      |                                                                 |                     | 0.091                      |
| Urban (n = 11,120)                          | 375/2,224 (16.9%)                 | 970/8,896 (10.9%)    | 1.43 (1.23-1.65)                                                | <0.001 <sup>a</sup> |                            |
| Rural (n = 18,845)                          | 654/3,769 (17.4%)                 | 1,857/15,076 (12.3%) | 1.23 (1.11-1.38)                                                | <0.001 <sup>a</sup> |                            |
| Obesity                                     |                                   |                      |                                                                 |                     | 0.662                      |
| Underweight (n = 1,183)                     | 51/251 (20.3%)                    | 114/932 (12.2%)      | 1.57 (1.04-2.38)                                                | <0.001 <sup>a</sup> |                            |
| Normal (n = 10,805)                         | 355/2,141 (16.6%)                 | 1,008/8,664 (11.6%)  | 1.23 (1.06-1.42)                                                | 0.006 <sup>a</sup>  |                            |
| Overweight (n = 7,819)                      | 269/1,564 (17.2%)                 | 769/6,255 (12.3%)    | 1.23 (1.04-1.45)                                                | 0.016 <sup>a</sup>  |                            |
| Obese (n = 10,158)                          | 354/2,037 (17.4%)                 | 936/8,121 (11.5%)    | 1.33 (1.15-1.54)                                                | <0.001 <sup>a</sup> |                            |
| Smoking status                              |                                   |                      |                                                                 |                     | 0.547                      |
| Nonsmokers (n = 22,836)                     | 810/4,733 (17.1%)                 | 2,162/18,103 (11.9%) | 1.26 (1.14-1.39)                                                | <0.001 <sup>a</sup> |                            |
| Past and current smokers (n = 7,129)        | 219/1,260 (17.4%)                 | 665/5,869 (11.3%)    | 1.35 (1.12-1.62)                                                | 0.001 <sup>a</sup>  |                            |
| Alcohol consumption                         |                                   |                      |                                                                 |                     | 0.074                      |
| <1 time a week (n = 17,400)                 | 792/4,680 (16.9%)                 | 1,917/17,436 (11.0%) | 1.34 (1.21-1.48)                                                | <0.001 <sup>a</sup> |                            |
| ≥1 time a week (n = 7,849)                  | 237/1,313 (18.1%)                 | 910/6,536 (13.9%)    | 1.10 (0.92-1.30)                                                | 0.306               |                            |
| Blood pressure                              |                                   |                      |                                                                 |                     | 0.434                      |
| SBP <140 mmHg and DBP <90 mmHg (n = 20,203) | 725/3,978 (18.2%)                 | 2,064/16,225 (12.7%) | 1.26 (1.13-1.39)                                                | <0.001 <sup>a</sup> |                            |
| SBP ≥140 mmHg and DBP ≥90 mmHg (n = 9,762)  | 304/2,015 (15.1%)                 | 763/7,747 (9.8%)     | 1.33 (1.13-1.55)                                                | 0.001 <sup>a</sup>  |                            |
| Fasting blood glucose                       |                                   |                      |                                                                 |                     | 0.011 <sup>a</sup>         |
| <100 mg/dL (n = 17,400)                     | 513/3,235 (15.9%)                 | 1,618/14,165 (11.4%) | 1.20 (1.07-1.36)                                                | 0.003 <sup>a</sup>  |                            |
| ≥100 mg/dL (n = 12,565)                     | 516/2,758 (18.7%)                 | 1,209/9,807 (12.3%)  | 1.36 (1.20-1.54)                                                | <0.001 <sup>a</sup> |                            |
| Total cholesterol level                     |                                   |                      |                                                                 |                     | 0.118                      |
| <200 mg/dL (n = 16,447)                     | 574/3,369 (17.0%)                 | 1,653/13,078 (12.6%) | 1.18 (1.05-1.33)                                                | 0.004 <sup>a</sup>  |                            |
| ≥200 mg/dL (n = 13,518)                     | 455/2,624 (17.3%)                 | 1,174/10,894 (10.8%) | 1.40 (1.23-1.60)                                                | <0.001 <sup>a</sup> |                            |
| Charlson Comorbidity Index                  |                                   |                      |                                                                 |                     | 0.016 <sup>a</sup>         |
| 0 (n = 15,930)                              | 367/2,376 (15.4%)                 | 1,402/13,554 (10.3%) | 1.29 (1.12-1.48)                                                | <0.001 <sup>a</sup> |                            |

|                                                                |                   |                      |                  |                     |                     |
|----------------------------------------------------------------|-------------------|----------------------|------------------|---------------------|---------------------|
| 1 (n = 5,760)                                                  | 228/1,369 (16.7%) | 588/4,391 (13.4%)    | 1.11 (0.93-1.34) | 0.255               |                     |
| ≥2 (n = 8,275)                                                 | 434/2,248 (19.3%) | 837/6,027 (13.9%)    | 1.32 (1.14-1.52) | <0.001 <sup>a</sup> |                     |
| Gastroesophageal reflux disease                                |                   |                      |                  |                     | 0.286               |
| No (n = 24,895)                                                | 395/4,746 (8.3%)  | 1,109/20,149 (5.5%)  | 1.36 (1.20-1.54) | <0.001 <sup>a</sup> |                     |
| Yes (n = 5,070)                                                | 634/1,247 (50.8%) | 1,718/3,823 (44.9%)  | 1.27 (1.12-1.45) | <0.001 <sup>a</sup> |                     |
| H2 blocker use                                                 |                   |                      |                  |                     | 0.028 <sup>a</sup>  |
| Nonusers (n = 10,069)                                          | 110/1,545 (7.1%)  | 498/8,524 (5.8%)     | 1.15 (0.90-1.46) | 0.268               |                     |
| Users (n = 19,896)                                             | 919/4,448 (20.7%) | 2,329/15,448 (15.1%) | 1.29 (1.18-1.42) | <0.001 <sup>a</sup> |                     |
| A history of head trauma                                       |                   |                      |                  |                     | <0.001 <sup>a</sup> |
| No (n = 28,671)                                                | 955/5,516 (17.3%) | 2,727/23,155 (11.8%) | 1.29 (1.18-1.40) | <0.001 <sup>a</sup> |                     |
| Yes (n = 1,294)                                                | 74/477 (15.5%)    | 100/817 (12.2%)      | 1.15 (0.78-1.68) | 0.486               |                     |
| A history of other degenerative diseases of the nervous system |                   |                      |                  |                     | <0.001 <sup>a</sup> |
| No (n = 28,933)                                                | 948/5,517 (17.2%) | 2,756/23,416 (11.8%) | 1.27 (1.17-1.39) | <0.001 <sup>a</sup> |                     |
| Yes (n = 1,032)                                                | 81/476 (17.0%)    | 71/556 (12.8%)       | 1.28 (0.86-1.89) | 0.221               |                     |

Note: DBP–Diastolic blood pressure; SBP–Systolic blood pressure. <sup>a</sup> Conditional or unconditional logistic regression analysis, Significance at P <0.05; <sup>b</sup> Adjusted for age, sex, income, region of residence, blood pressure, fasting blood glucose, total cholesterol level, obesity, smoking, alcohol consumption, the Charlson comorbidity index, gastroesophageal reflux disease, H2 blocker use, and a history of head trauma or other degenerative diseases of the nervous system.

**Table S2.** Adjusted odds ratios of proton pump inhibitor use for ≥30 days compared to proton pump inhibitor use for <30 days with subgroup analyses stratified by covariates

| Characteristics                             | Number of<br>Parkinson's diseases | Number of controls  | Odds ratios for Parkinson's disease<br>(95% confidence interval) |                     | P-value for<br>interaction |
|---------------------------------------------|-----------------------------------|---------------------|------------------------------------------------------------------|---------------------|----------------------------|
|                                             | (exposure/total, %)               | (exposure/total, %) | Adjusted <sup>b</sup>                                            | P-value             |                            |
| Age groups                                  |                                   |                     |                                                                  |                     | 0.316                      |
| Age <75 years old (n = 18,470)              | 477/3,694 (12.9%)                 | 1,197/14,776 (8.1%) | 1.31 (1.15-1.49)                                                 | <0.001 <sup>a</sup> |                            |
| Age ≥75 years old (n = 11,495)              | 360/2,299 (15.7%)                 | 898/9,196 (9.8%)    | 1.49 (1.29-1.73)                                                 | <0.001 <sup>a</sup> |                            |
| Sex                                         |                                   |                     |                                                                  |                     | 0.396                      |
| Male (n = 14,000)                           | 350/2,800 (12.5%)                 | 956/11,200 (8.5%)   | 1.27 (1.10-1.47)                                                 | 0.001 <sup>a</sup>  |                            |
| Female (n = 15,965)                         | 487/3,193 (15.3%)                 | 1,139/12,772 (8.9%) | 1.48 (1.30-1.69)                                                 | <0.001 <sup>a</sup> |                            |
| Income groups                               |                                   |                     |                                                                  |                     | 0.167                      |
| Low (n = 13,085)                            | 390/2,617 (14.9%)                 | 892/10,468 (8.5%)   | 1.56 (1.35-1.80)                                                 | <0.001 <sup>a</sup> |                            |
| High (n = 16,880)                           | 447/3,376 (13.2%)                 | 1,203/13,504 (8.9%) | 1.26 (1.10-1.44)                                                 | 0.001 <sup>a</sup>  |                            |
| Region of residence                         |                                   |                     |                                                                  |                     | 0.478                      |
| Urban (n = 11,120)                          | 290/2,224 (13.0%)                 | 718/8,896 (8.1%)    | 1.45 (1.22-1.71)                                                 | <0.001 <sup>a</sup> |                            |
| Rural (n = 18,845)                          | 547/3,769 (14.5%)                 | 1,377/15,076 (9.1%) | 1.36 (1.21-1.54)                                                 | <0.001 <sup>a</sup> |                            |
| Obesity                                     |                                   |                     |                                                                  |                     | 0.621                      |
| Underweight (n = 1,183)                     | 44/251 (17.5%)                    | 79/932 (8.5%)       | 2.14 (1.37-3.34)                                                 | 0.001 <sup>a</sup>  |                            |
| Normal (n = 10,805)                         | 284/2,141 (13.3%)                 | 734/8,664 (8.5%)    | 1.25 (1.06-1.48)                                                 | 0.009 <sup>a</sup>  |                            |
| Overweight (n = 7,819)                      | 226/1,564 (14.5%)                 | 546/6,255 (8.7%)    | 1.45 (1.20-1.75)                                                 | <0.001 <sup>a</sup> |                            |
| Obese (n = 10,158)                          | 283/2,037 (13.9%)                 | 736/8,121 (9.1%)    | 1.33 (1.12-1.56)                                                 | 0.001 <sup>a</sup>  |                            |
| Smoking status                              |                                   |                     |                                                                  |                     | 0.945                      |
| Nonsmokers (n = 22,836)                     | 657/4,733 (13.9%)                 | 1,584/18,103 (8.7%) | 1.35 (1.21-1.51)                                                 | <0.001 <sup>a</sup> |                            |
| Past and current smokers (n = 7,129)        | 180/1,260 (14.3%)                 | 511/5,869 (8.7%)    | 1.40 (1.14-1.72)                                                 | 0.001 <sup>a</sup>  |                            |
| Alcohol consumption                         |                                   |                     |                                                                  |                     | 0.523                      |
| <1 time a week (n = 17,400)                 | 639/4,680 (13.7%)                 | 1,442/17,436 (8.3%) | 1.39 (1.24-1.55)                                                 | <0.001 <sup>a</sup> |                            |
| ≥1 time a week (n = 7,849)                  | 198/1,313 (15.1%)                 | 653/6,536 (10.0%)   | 1.27 (1.05-1.54)                                                 | 0.015 <sup>a</sup>  |                            |
| Blood pressure                              |                                   |                     |                                                                  |                     | 0.752                      |
| SBP <140 mmHg and DBP <90 mmHg (n = 20,203) | 602/3,978 (15.1%)                 | 1,544/16,225 (9.5%) | 1.37 (1.22-1.53)                                                 | <0.001 <sup>a</sup> |                            |
| SBP ≥140 mmHg and DBP ≥90 mmHg (n = 9,762)  | 235/2,015 (11.7%)                 | 551/7,747 (7.1%)    | 1.35 (1.13-1.62)                                                 | 0.001 <sup>a</sup>  |                            |
| Fasting blood glucose                       |                                   |                     |                                                                  |                     | 0.085                      |
| <100 mg/dL (n = 17,400)                     | 418/3,235 (12.9%)                 | 1,177/14,165 (8.3%) | 1.31 (1.14-1.50)                                                 | <0.001 <sup>a</sup> |                            |
| ≥100 mg/dL (n = 12,565)                     | 419/2,758 (15.2%)                 | 918/9,807 (9.4%)    | 1.42 (1.23-1.63)                                                 | <0.001 <sup>a</sup> |                            |
| Total cholesterol level                     |                                   |                     |                                                                  |                     | 0.909                      |
| <200 mg/dL (n = 16,447)                     | 489/3,369 (14.5%)                 | 1,230/13,078 (9.4%) | 1.35 (1.19-1.53)                                                 | <0.001 <sup>a</sup> |                            |
| ≥200 mg/dL (n = 13,518)                     | 348/2,624 (13.3%)                 | 865/10,894 (7.9%)   | 1.37 (1.18-1.59)                                                 | <0.001 <sup>a</sup> |                            |
| Charlson Comorbidity Index                  |                                   |                     |                                                                  |                     | 0.028 <sup>a</sup>         |

|                                                                |                   |                      |                  |                     |                     |
|----------------------------------------------------------------|-------------------|----------------------|------------------|---------------------|---------------------|
| 0 (n = 15,930)                                                 | 287/2,376 (12.1%) | 999/13,554 (7.4%)    | 1.34 (1.14-1.57) | <0.001 <sup>a</sup> | 0.076               |
| 1 (n = 5,760)                                                  | 181/1,369 (13.2%) | 430/4,391 (9.8%)     | 1.23 (1.00-1.51) | 0.050               |                     |
| ≥2 (n = 8,275)                                                 | 369/2,248 (16.4%) | 666/6,027 (11.1%)    | 1.40 (1.20-1.63) | <0.001 <sup>a</sup> |                     |
| Gastroesophageal reflux disease                                |                   |                      |                  |                     | 0.001 <sup>a</sup>  |
| No (n = 24,895)                                                | 302/4,746 (6.4%)  | 746/20,149 (3.7%)    | 1.52 (1.32-1.76) | <0.001 <sup>a</sup> |                     |
| Yes (n = 5,070)                                                | 535/1,247 (42.9%) | 1,349/3,823 (35.3%)  | 1.34 (1.17-1.54) | <0.001 <sup>a</sup> |                     |
| H2 blocker use                                                 |                   |                      |                  |                     | <0.001 <sup>a</sup> |
| Nonusers (n = 10,069)                                          | 87/1,545 (5.6%)   | 379/8,524 (4.4%)     | 1.13 (0.86-1.49) | 0.368               |                     |
| Users (n = 19,896)                                             | 750/4,448 (16.9%) | 1,716/15,448 (11.1%) | 1.39 (1.25-1.54) | <0.001 <sup>a</sup> |                     |
| A history of head trauma                                       |                   |                      |                  |                     | <0.001 <sup>a</sup> |
| No (n = 28,671)                                                | 771/5,516 (14.0%) | 2,023/23,155 (8.7%)  | 1.35 (1.22-1.49) | <0.001 <sup>a</sup> |                     |
| Yes (n = 1,294)                                                | 66/477 (13.8%)    | 72/817 (8.8%)        | 1.62 (1.06-2.47) | 0.024 <sup>a</sup>  |                     |
| A history of other degenerative diseases of the nervous system |                   |                      |                  |                     | <0.001 <sup>a</sup> |
| No (n = 28,933)                                                | 770/5,517 (14.0%) | 2,036/23,416 (8.7%)  | 1.37 (1.24-1.51) | <0.001 <sup>a</sup> |                     |
| Yes (n = 1,032)                                                | 67/476 (14.1%)    | 59/556 (10.6%)       | 1.22 (0.79-1.87) | 0.369               |                     |

Note: DBP–Diastolic blood pressure; SBP–Systolic blood pressure. <sup>a</sup>Conditional or unconditional logistic regression analysis, Significance at P <0.05; <sup>b</sup>Adjusted for age, sex, income, region of residence, blood pressure, fasting blood glucose, total cholesterol level, obesity, smoking, alcohol consumption, the Charlson comorbidity index, gastroesophageal reflux disease, H2 blocker use, and a history of head trauma or other degenerative diseases of the nervous system.

**Table S3.** Adjusted odds ratios for Parkinson's disease per 90 days of proton pump inhibitor use with subgroup analyses stratified by covariates

| Characteristics                | Mean duration of PPI use in Parkinson's disease (Standard deviation) | Mean duration of PPI use in control (Standard deviation) | Odds ratios for Parkinson's disease (95% confidence interval) |                     | P-value for Interaction |
|--------------------------------|----------------------------------------------------------------------|----------------------------------------------------------|---------------------------------------------------------------|---------------------|-------------------------|
|                                |                                                                      |                                                          | Adjusted <sup>b</sup>                                         | P-value             |                         |
| Age <75 years old (n = 18,470) |                                                                      |                                                          |                                                               |                     | First-generation        |
| First-generation PPIs          | 10.50 (40.87)                                                        | 6.04 (30.48)                                             | 1.16 (1.06-1.27)                                              | 0.002 <sup>a</sup>  | PPIs: 0.173             |
| Second-generation PPIs         | 5.94 (30.70)                                                         | 3.40 (23.06)                                             | 1.19 (1.06-1.35)                                              | 0.005 <sup>a</sup>  | Second-generation PPIs: |
| Age ≥75 years old (n = 11,495) |                                                                      |                                                          |                                                               |                     | 0.049 <sup>a</sup>      |
| First-generation PPIs          | 12.12 (44.79)                                                        | 7.48 (37.77)                                             | 1.16 (1.05-1.27)                                              | 0.003 <sup>a</sup>  |                         |
| Second-generation PPIs         | 8.85 (42.28)                                                         | 6.18 (34.18)                                             | 1.11 (1.00-1.24)                                              | 0.049 <sup>a</sup>  |                         |
| Male (n = 14,000)              |                                                                      |                                                          |                                                               |                     | First-generation        |
| First-generation PPIs          | 9.86 (39.54)                                                         | 6.15 (32.03)                                             | 1.16 (1.05-1.29)                                              | 0.005 <sup>a</sup>  | PPIs: 0.915             |
| Second-generation PPIs         | 6.22 (33.65)                                                         | 4.28 (27.12)                                             | 1.12 (0.99-1.27)                                              | 0.078               | Second-generation PPIs: |
| Female (n = 16,880)            |                                                                      |                                                          |                                                               |                     | 0.774                   |
| First-generation PPIs          | 12.22 (44.78)                                                        | 6.97 (34.68)                                             | 1.16 (1.06-1.27)                                              | 0.001 <sup>a</sup>  |                         |
| Second-generation PPIs         | 7.79 (37.25)                                                         | 4.63 (28.55)                                             | 1.16 (1.04-1.29)                                              | 0.007 <sup>a</sup>  |                         |
| Low income (n = 13,085)        |                                                                      |                                                          |                                                               |                     | First-generation        |
| First-generation PPIs          | 11.77 (43.14)                                                        | 6.97 (35.35)                                             | 1.17 (1.06-1.29)                                              | 0.002 <sup>a</sup>  | PPIs: 0.692             |
| Second-generation PPIs         | 7.67 (37.86)                                                         | 4.29 (27.61)                                             | 1.24 (1.11-1.40)                                              | <0.001 <sup>a</sup> | Second-generation PPIs: |
| High income (n = 16,880)       |                                                                      |                                                          |                                                               |                     | 0.217                   |
| First-generation PPIs          | 10.62 (41.86)                                                        | 6.29 (31.94)                                             | 1.16 (1.06-1.27)                                              | 0.002 <sup>a</sup>  |                         |
| Second-generation PPIs         | 6.58 (33.78)                                                         | 4.60 (28.11)                                             | 1.07 (0.96-1.20)                                              | 0.238               |                         |
| Urban residents (n = 11,120)   |                                                                      |                                                          |                                                               |                     | First-generation        |
| First-generation PPIs          | 9.56 (39.24)                                                         | 6.15 (32.31)                                             | 1.11 (0.99-1.25)                                              | 0.071               | PPIs: 0.528             |
| Second-generation PPIs         | 6.49 (33.92)                                                         | 3.99 (25.39)                                             | 1.19 (1.03-1.38)                                              | 0.015 <sup>a</sup>  | Second-generation PPIs: |
| Rural residents (n = 18,845)   |                                                                      |                                                          |                                                               |                     | 0.446                   |
| First-generation PPIs          | 12.04 (44.17)                                                        | 6.85 (34.14)                                             | 1.18 (1.09-1.29)                                              | <0.001 <sup>a</sup> |                         |
| Second-generation PPIs         | 7.39 (36.60)                                                         | 4.75 (29.26)                                             | 1.13 (1.02-1.24)                                              | 0.018 <sup>a</sup>  |                         |
| Underweight (n = 1,183)        |                                                                      |                                                          |                                                               |                     | First-generation        |
| First-generation PPIs          | 15.20 (47.95)                                                        | 5.53 (31.02)                                             | 1.67 (1.19-2.34)                                              | 0.003 <sup>a</sup>  | PPIs: 0.233             |
| Second-generation PPIs         | 9.51 (46.66)                                                         | 5.49 (31.66)                                             | 1.17 (0.84-1.63)                                              | 0.344               | Second-generation PPIs: |
| Normal weight (n = 10,805)     |                                                                      |                                                          |                                                               |                     | 0.970                   |
| First-generation PPIs          | 10.73 (40.28)                                                        | 6.23 (31.90)                                             | 1.17 (1.04-1.32)                                              | 0.010 <sup>a</sup>  |                         |
| Second-generation PPIs         | 6.72 (33.63)                                                         | 4.48 (28.34)                                             | 1.09 (0.95-1.26)                                              | 0.232               |                         |
| Overweight (n = 7,819)         |                                                                      |                                                          |                                                               |                     |                         |
| First-generation PPIs          | 9.66 (36.85)                                                         | 6.31 (32.77)                                             | 1.10 (0.96-1.27)                                              | 0.164               |                         |

|                                                 |               |              |                  |                     |                                      |
|-------------------------------------------------|---------------|--------------|------------------|---------------------|--------------------------------------|
| Second-generation PPIs                          | 7.57 (37.16)  | 4.21 (25.66) | 1.27 (1.09-1.49) | 0.003 <sup>a</sup>  |                                      |
| Obese (n = 10,158)                              |               |              |                  |                     |                                      |
| First-generation PPIs                           | 12.14 (47.56) | 7.31 (35.83) | 1.14 (1.02-1.27) | 0.018 <sup>a</sup>  |                                      |
| Second-generation PPIs                          | 6.73 (34.88)  | 4.53 (28.59) | 1.10 (0.95-1.26) | 0.203               |                                      |
| Nonsmokers (n = 22,836)                         |               |              |                  |                     | First-generation<br>PPIs: 0.904      |
| First-generation PPIs                           | 11.14 (42.40) | 6.59 (33.23) | 1.16 (1.08-1.26) | <0.001 <sup>a</sup> |                                      |
| Second-generation PPIs                          | 6.90 (34.63)  | 4.38 (27.52) | 1.15 (1.05-1.26) | 0.003 <sup>a</sup>  | Second-<br>generation PPIs:<br>0.972 |
| Past and current smokers (n = 7,129)            |               |              |                  |                     |                                      |
| First-generation PPIs                           | 11.03 (42.52) | 6.58 (34.20) | 1.14 (0.99-1.30) | 0.070               | First-generation<br>PPIs: 0.773      |
| Second-generation PPIs                          | 7.64 (39.14)  | 4.74 (29.00) | 1.14 (0.97-1.34) | 0.123               |                                      |
| Alcohol consumption <1 time a week (n = 17,400) |               |              |                  |                     | Second-<br>generation PPIs:<br>0.540 |
| First-generation PPIs                           | 11.04 (41.65) | 6.52 (33.20) | 1.15 (1.06-1.24) | <0.001 <sup>a</sup> |                                      |
| Second-generation PPIs                          | 6.70 (34.95)  | 3.99 (26.40) | 1.15 (1.04-1.26) | 0.005 <sup>a</sup>  | First-generation<br>PPIs: 0.599      |
| Alcohol consumption ≥1 time a week (n = 7,849)  |               |              |                  |                     |                                      |
| First-generation PPIs                           | 11.42 (45.09) | 6.77 (34.20) | 1.14 (1.00-1.30) | 0.054               | Second-<br>generation PPIs:<br>0.902 |
| Second-generation PPIs                          | 8.35 (37.90)  | 5.74 (31.48) | 1.07 (0.92-1.25) | 0.394               |                                      |
| SBP <140 mmHg and DBP <90 mmHg (n = 20,203)     |               |              |                  |                     | First-generation<br>PPIs: 0.211      |
| First-generation PPIs                           | 12.00 (43.62) | 6.95 (33.86) | 1.17 (1.08-1.27) | <0.001 <sup>a</sup> |                                      |
| Second-generation PPIs                          | 7.81 (37.12)  | 4.85 (28.64) | 1.13 (1.03-1.25) | 0.010 <sup>a</sup>  | Second-<br>generation PPIs:<br>0.156 |
| SBP ≥140 mmHg and DBP ≥90 mmHg (n = 9,762)      |               |              |                  |                     |                                      |
| First-generation PPIs                           | 9.38 (39.91)  | 5.84 (32.63) | 1.10 (0.97-1.24) | 0.141               | First-generation<br>PPIs: 0.869      |
| Second-generation PPIs                          | 5.57 (32.42)  | 3.65 (26.23) | 1.12 (0.96-1.30) | 0.143               |                                      |
| Fasting blood glucose <100 mg/dL (n = 17,400)   |               |              |                  |                     | Second-<br>generation PPIs:<br>0.879 |
| First-generation PPIs                           | 10.29 (39.70) | 6.31 (32.75) | 1.13 (1.03-1.24) | 0.011 <sup>a</sup>  |                                      |
| Second-generation PPIs                          | 5.69 (29.70)  | 3.91 (24.98) | 1.10 (0.97-1.24) | 0.153               | First-generation<br>PPIs: 0.699      |
| Fasting blood glucose ≥100 mg/dL (n = 12,565)   |               |              |                  |                     |                                      |
| First-generation PPIs                           | 12.10 (45.40) | 6.99 (34.49) | 1.17 (1.06-1.29) | 0.001 <sup>a</sup>  |                                      |
| Second-generation PPIs                          | 8.66 (41.45)  | 5.27 (31.60) | 1.14 (1.03-1.27) | 0.012 <sup>a</sup>  |                                      |
| Total cholesterol level <200 mg/dL (n = 16,447) |               |              |                  |                     |                                      |
| First-generation PPIs                           | 11.89 (44.67) | 7.11 (35.35) | 1.15 (1.06-1.25) | 0.001 <sup>*</sup>  |                                      |
| Second-generation PPIs                          | 7.34 (37.17)  | 4.91 (29.80) | 1.11 (1.00-1.23) | 0.050 <sup>a</sup>  |                                      |
| Total cholesterol level ≥200 mg/dL (n = 13,518) |               |              |                  |                     |                                      |
| First-generation PPIs                           | 10.13 (39.33) | 5.96 (31.05) | 1.14 (1.02-1.27) | 0.020 <sup>a</sup>  |                                      |
| Second-generation PPIs                          | 6.69 (33.53)  | 3.93 (25.41) | 1.15 (1.01-1.31) | 0.034 <sup>a</sup>  |                                      |
| Charlson Comorbidity Index = 0 (n = 15,930)     |               |              |                  |                     |                                      |
| First-generation PPIs                           | 8.83 (36.03)  | 4.80 (26.61) | 1.23 (1.09-1.39) | 0.001 <sup>a</sup>  |                                      |
| Second-generation PPIs                          | 5.95 (31.41)  | 3.77 (24.70) | 1.10 (0.96-1.27) | 0.180               |                                      |

|                                                                              |               |               |                  |                     |                                             |
|------------------------------------------------------------------------------|---------------|---------------|------------------|---------------------|---------------------------------------------|
| Charlson Comorbidity Index = 1 (n = 5,760)                                   |               |               |                  |                     | Second-generation PPIs: 0.102               |
| First-generation PPIs                                                        | 10.69 (42.27) | 8.32 (39.72)  | 1.06 (0.92-1.21) | 0.441               |                                             |
| Second-generation PPIs                                                       | 6.65 (34.57)  | 5.04 (29.63)  | 1.12 (0.94-1.33) | 0.218               |                                             |
| Charlson Comorbidity Index ≥2 (n = 8,275)                                    |               |               |                  |                     |                                             |
| First-generation PPIs                                                        | 13.80 (48.23) | 9.35 (41.19)  | 1.14 (1.03-1.26) | 0.009 <sup>a</sup>  |                                             |
| Second-generation PPIs                                                       | 8.47 (40.12)  | 5.60 (32.86)  | 1.19 (1.05-1.35) | 0.005 <sup>a</sup>  |                                             |
| No gastroesophageal reflux disease n = 24,895)                               |               |               |                  |                     | First-generation PPIs: 0.137                |
| First-generation PPIs                                                        | 4.86 (28.43)  | 2.74 (21.70)  | 1.26 (1.13-1.40) | <0.001 <sup>a</sup> |                                             |
| Second-generation PPIs                                                       | 2.73 (23.02)  | 1.81 (19.19)  | 1.15 (1.01-1.31) | 0.036 <sup>a</sup>  | Second-generation PPIs: 0.996               |
| Gastroesophageal reflux disease (n = 5,070)                                  |               |               |                  |                     |                                             |
| First-generation PPIs                                                        | 34.94 (69.70) | 26.90 (63.67) | 1.15 (1.06-1.25) | 0.001 <sup>a</sup>  |                                             |
| Second-generation PPIs                                                       | 23.53 (61.16) | 18.48 (51.99) | 1.19 (1.07-1.31) | 0.001 <sup>a</sup>  |                                             |
| H2 blocker nonusers (n = 10,069)                                             |               |               |                  |                     | First-generation PPIs: 0.037 <sup>a</sup>   |
| First-generation PPIs                                                        | 5.02 (34.15)  | 3.67 (27.03)  | 1.06 (0.89-1.26) | 0.489               |                                             |
| Second-generation PPIs                                                       | 4.23 (32.42)  | 2.74 (24.52)  | 1.16 (0.98-1.37) | 0.077               | Second-generation PPIs: 0.503               |
| H2 blocker users (n = 19,896)                                                |               |               |                  |                     |                                             |
| First-generation PPIs                                                        | 13.24 (44.75) | 8.20 (36.44)  | 1.16 (1.08-1.25) | <0.001 <sup>a</sup> |                                             |
| Second-generation PPIs                                                       | 8.04 (36.62)  | 5.42 (29.54)  | 1.12 (1.02-1.23) | 0.014 <sup>a</sup>  |                                             |
| No history of head trauma (n = 28,671)                                       |               |               |                  |                     | First-generation PPIs: 0.014 <sup>a</sup>   |
| First-generation PPIs                                                        | 11.12 (42.39) | 6.54 (33.29)  | 1.19 (1.11-1.27) | <0.001 <sup>a</sup> |                                             |
| Second-generation PPIs                                                       | 7.21 (36.51)  | 4.53 (28.22)  | 1.15 (1.06-1.25) | 0.001 <sup>a</sup>  | Second-generation PPIs: 0.001 <sup>a</sup>  |
| A history of head trauma (n = 1,294)                                         |               |               |                  |                     |                                             |
| First-generation PPIs                                                        | 11.14 (42.87) | 7.94 (38.18)  | 1.24 (0.94-1.62) | 0.124               |                                             |
| Second-generation PPIs                                                       | 5.24 (22.85)  | 2.75 (15.96)  | 1.92 (1.05-3.49) | 0.034 <sup>a</sup>  |                                             |
| No history of other degenerative diseases of the nervous system (n = 28,933) |               |               |                  |                     | First-generation PPIs: <0.001 <sup>a</sup>  |
| First-generation PPIs                                                        | 11.11 (42.39) | 6.56 (33.37)  | 1.19 (1.11-1.27) | <0.001 <sup>a</sup> |                                             |
| Second-generation PPIs                                                       | 6.92 (34.53)  | 4.51 (28.13)  | 1.22 (0.88-1.70) | 0.230               | Second-generation PPIs: <0.001 <sup>a</sup> |
| A history of other degenerative diseases of the nervous system (n = 1,032)   |               |               |                  |                     |                                             |
| First-generation PPIs                                                        | 11.27 (42.87) | 7.86 (37.39)  | 1.14 (1.04-1.24) | 0.003 <sup>a</sup>  |                                             |
| Second-generation PPIs                                                       | 8.66 (46.41)  | 2.71 (14.62)  | 1.80 (1.11-2.92) | 0.017 <sup>a</sup>  |                                             |

Note: DBP–Diastolic blood pressure; SBP–Systolic blood pressure. <sup>a</sup> Conditional or unconditional logistic regression analysis, Significance at P <0.05; <sup>b</sup> Adjusted for age, sex, income, region of residence, blood pressure, fasting blood glucose, total cholesterol level, obesity, smoking, alcohol consumption, the Charlson comorbidity index, gastroesophageal reflux disease, H2 blocker use, and a history of head trauma or other degenerative diseases of the nervous system.
